# Supplementary material for: Slow-Release Lanthanum Effectively Reduces Phosphate in Eutrophic Ponds without Accumulating in Fish
Source: MDPI journal article supplement (doi:10.3390/environments10020020), 2023-01-27
Supplement: s1 [file s1]

# Slow-Release Lanthanum Effectively Reduces Phosphate in Eutrophic Ponds without Accumulating in Fish

Callie McCright, Jenna McCoy, Natalie Robbins and Steve Comfort \*

School of Natural Resources, University of Nebraska, Lincoln, NE 68583, USA

\* Correspondence: scomfort@unl.edu

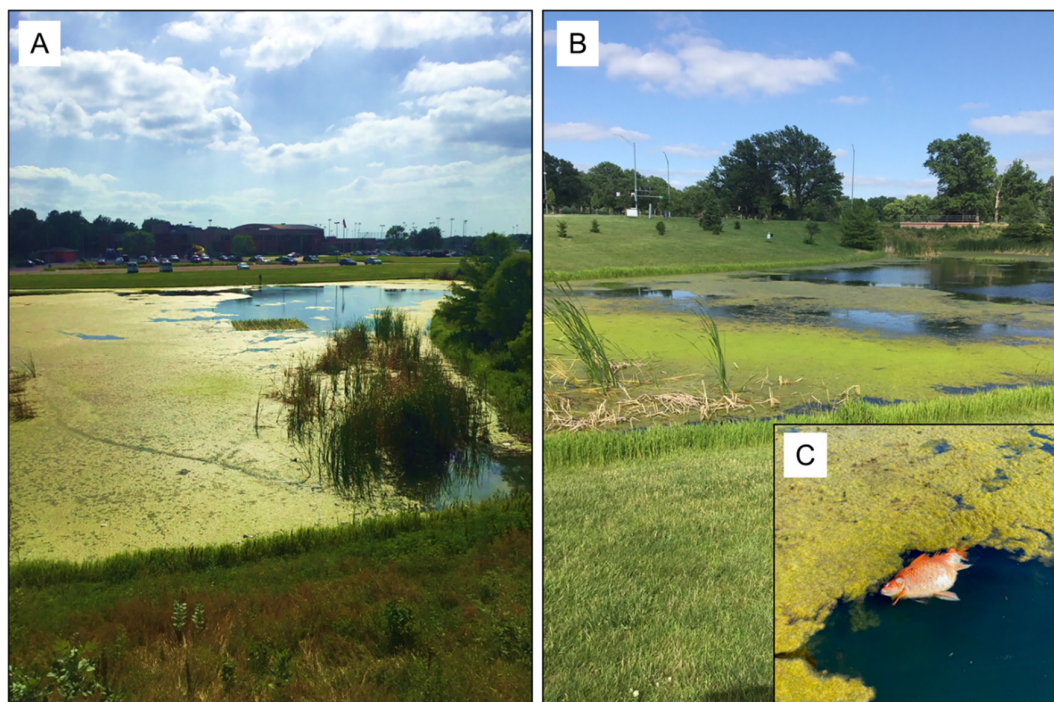

**Figure S1.** A. and B. Photographs of eutrophic pond (Densmore Pond, Lincoln, NE, USA) in 2020. C. Dead koi fish at Densmore Pond, July 2020.

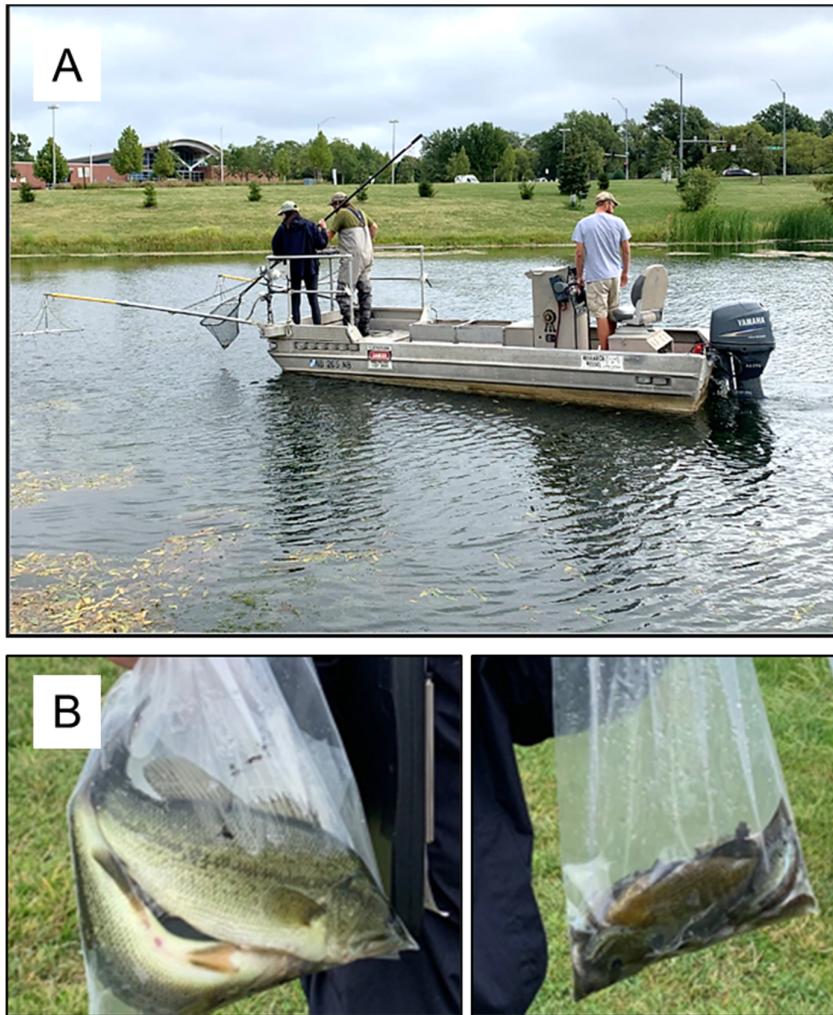

**Figure S2.** A. Nebraska Game and Parks electrofishing at Densmore Pond. B. Large-mouth bass and bluegills harvested from electrofishing.
